# Supplementary material for: CLOCK gene variation is associated with incidence of type-2 diabetes and cardiovascular diseases in type-2 diabetic subjects: dietary modulation in the PREDIMED randomized trial
Source: PubMed Central journal article supplement (PMC4704407; doi:10.1186/s12933-015-0327-8), 2016-01-07
Supplement: 12933_2015_327_MOESM1_ESM.pdf [file 12933_2015_327_MOESM1_ESM.pdf]

## **CLOCK gene variation is associated with incidence of type-2 diabetes and cardiovascular diseases in type-2 diabetic subjects: Dietary modulation in the PREDIMED randomized trial**

Corella D et al.

### **SUPPORTING ONLINE MATERIAL**

- **Figure S1: Flow-chart for the primary outcome of the PREDIMED trial.**
- **Figure S2: Cumulative T2D-free survival by CLOCK-rs4580704 genotypes in non-T2D subjects at baseline depending on the dietary intervention group.** A: Mediterranean diet groups (n=2,477); and B: control group (n=1,194). Cox regression models with outcome of T2D incidence by the CLOCK-rs4580704 SNP (CC versus carriers of the G-allele) were multivariable adjusted for each stratum and the corresponding hazard ratios (HR) and 95%CI were obtained in the multivariable adjusted models. CC subjects were considered the reference category and HR for G-carriers versus CC were estimated. HR1: model adjusted for sex, age and field center. HR2: Models additionally adjusted for BMI, drinking, smoking, physical activity, medications and total energy intake at baseline.
- **Figure S3: Cumulative stroke-free survival by CLOCK-rs4580704 genotypes in T2D subjects at baseline (n=3,427).** Cox regression models with outcome of stroke incidence by the CLOCK-rs4580704 SNP were multivariable adjusted. Hazard ratios (HR) and 95%CI were obtained in the multivariable adjusted models. CC subjects were considered the reference category and HR for G-carriers versus CC were estimated in the model adjusted for sex, age, field center, dietary intervention group, BMI, drinking, smoking, physical activity, medications and total energy intake at baseline.
- **Table S1: Demographic, clinical, lifestyle and genetic characteristics of the PREDIMED study participants at baseline according to the dietary intervention groups.**
- **Table S2: Demographic, clinical and lifestyle characteristics of the PREDIMED study participants at baseline according to the T2D status.**
- **Table S3. Incidence rate and hazard ratios (HR) for total cardiovascular diseases (CVD) depending on the CLOCK-rs4580704. Total and stratified by T2D status at baseline.**
- **Table S4. Incidence rate and hazard ratios (HR) for stroke depending on the CLOCK-rs4580704 in T2D subjects and stratified by dietary intervention.**

**Figure S1: Flow-chart for the primary outcome of the PREDIMED trial.**

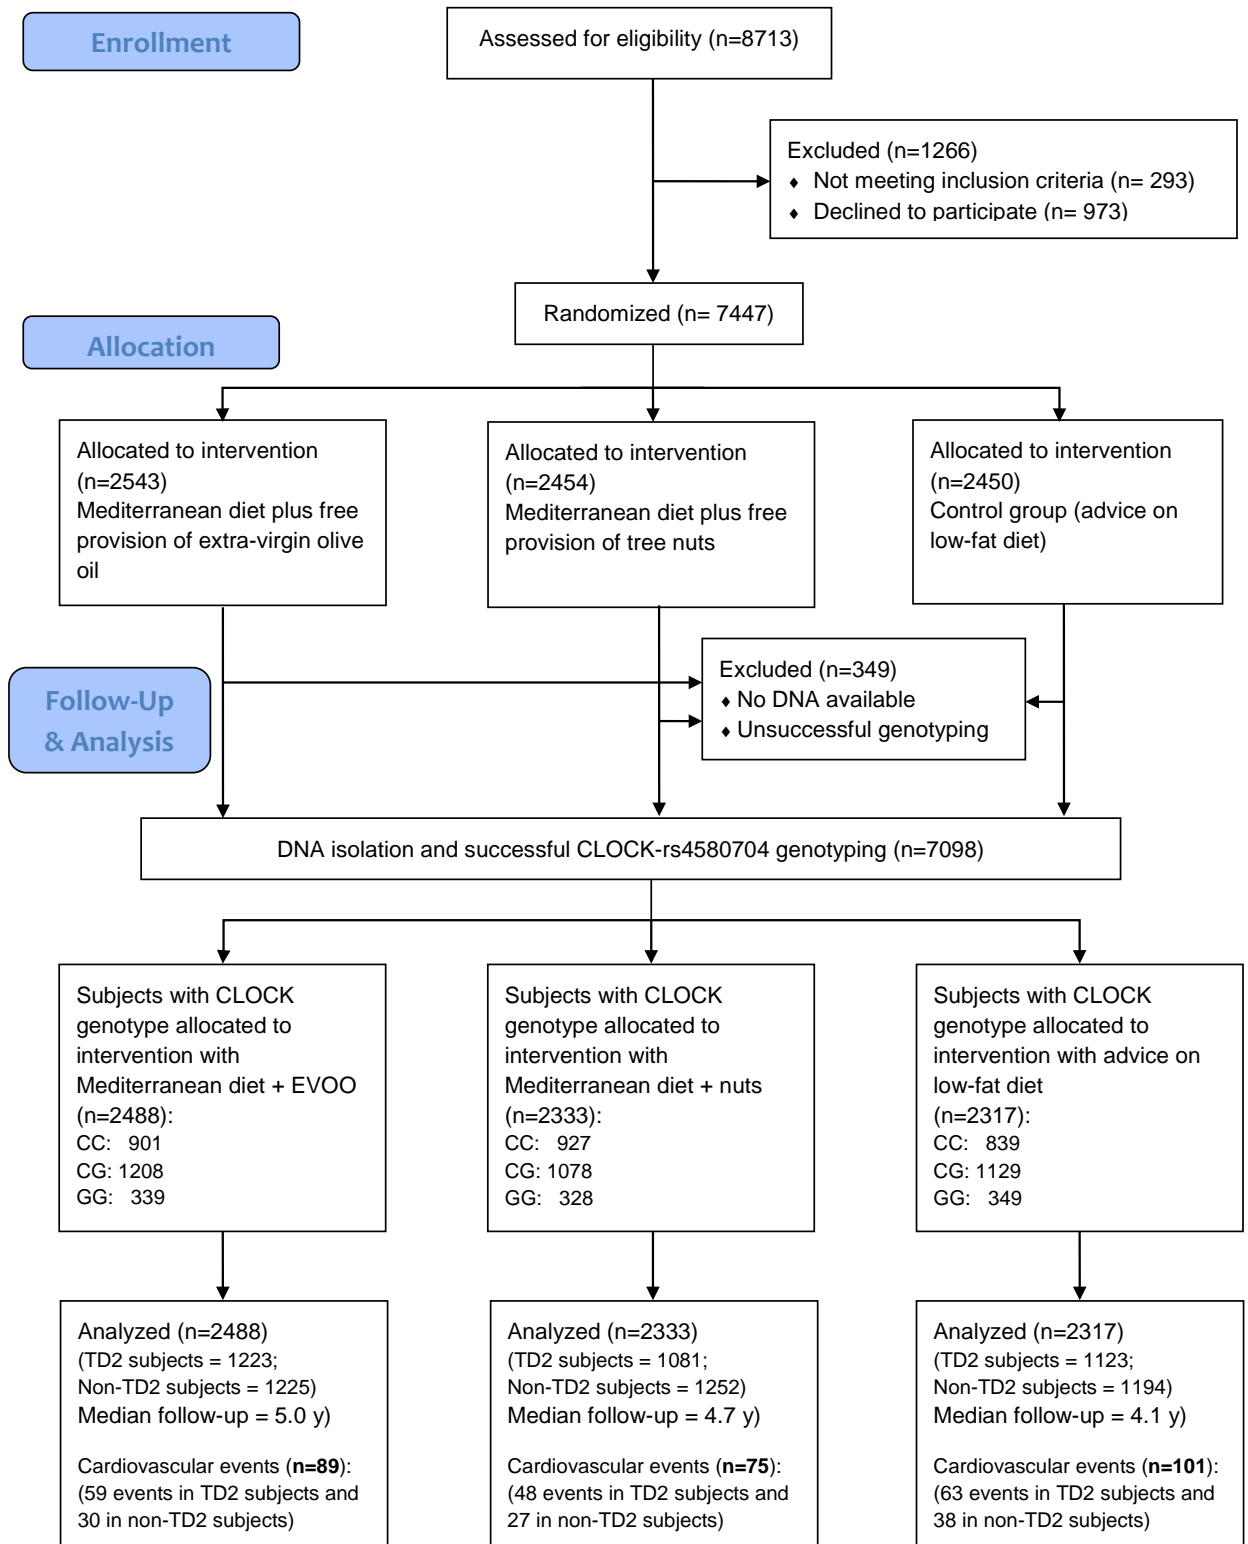

**Table S1: Demographic, clinical, lifestyle and genetic characteristics of the PREDIMED study participants at baseline according to the dietary intervention groups<sup>a</sup>**

|                                                | Total <sup>b</sup><br>(n=7,098) | MedDiet with<br>EVOO (n=2,448) | MedDiet with<br>Nuts (n=2,333) | Control group<br>(n=2,317) |
|------------------------------------------------|---------------------------------|--------------------------------|--------------------------------|----------------------------|
| Age (years)                                    | 67.0 (6.2)                      | 67.0 (6.1)                     | 67.3 (6.1)                     | 67.3 (6.3)                 |
| Weight (Kg)                                    | 76.8 (12.0)                     | 76.6 (11.9)                    | 77.0 (11.9)                    | 77.0 (12.2)                |
| BMI (Kg/m <sup>2</sup> )                       | 30.0 (3.8)                      | 29.9 (0.1)                     | 30.2 (0.1)                     | 30.2 (4.0)                 |
| Waist circumference (cm)                       | 100.4 (10.6)                    | 100.1 (10.5)                   | 100.8 (10.5)                   | 100.8 (10.9)               |
| Female sex : n, %                              | 4070 (57.3)                     | 1438 (53.6)                    | 1381 (53.6)                    | 1381 (59.6)                |
| Current smokers: n, %                          | 1002 (14.1)                     | 343 (14.5)                     | 320 (14.5)                     | 320 (13.8)                 |
| Type 2 diabetes: n, %                          | 3427 (48.3)                     | 1223 (46.3)                    | 1123 (46.3)                    | 1123 (48.5)                |
| Hypertension: n, %                             | 5876 (82.8)                     | 2007 (82.6)                    | 1943 (82.6)                    | 1943 (83.9)                |
| Dyslipidemia: n, %                             | 5131 (72.3)                     | 1755 (73.2)                    | 1669 (73.2)                    | 1669 (72.0)                |
| CLOCK-rs4580704: n, %                          |                                 |                                |                                |                            |
| CC                                             | 2667 (37.6)                     | 901 (39.7)                     | 839 (39.7)                     | 839 (36.2)                 |
| CG                                             | 3415 (48.1)                     | 1208 (46.2)                    | 1129 (46.2)                    | 1129 (48.7)                |
| GG                                             | 1016 (14.3)                     | 339 (14.1)                     | 349 (14.1)                     | 349 (15.1)                 |
| SBP (mm Hg)                                    | 149.4 (20.8)                    | 148.5 (20.4)                   | 150.1 (20.4)                   | 150.1 (21.0)               |
| DBP (mm Hg)                                    | 83 (11)                         | 83 (11)                        | 84 (11)                        | 84 (11)                    |
| Heart rate (bpm)                               | 71.4 (11.1)                     | 71.3 (11.0)                    | 71.6 (11.0)                    | 71.6 (11.3)                |
| Total cholesterol (mg/dL)                      | 210.5 (38.2)                    | 213.0 (37.5)                   | 209.1 (37.5)                   | 209.1 (38.9)               |
| LDL-C (mg/dL)                                  | 129.6 (33.7)                    | 131.7 (33.8)                   | 128.5 (33.8)                   | 128.5 (34.4)               |
| HDL-C (mg/dL)                                  | 53.8 (13.9)                     | 54.1 (13.9)                    | 53.6 (13.9)                    | 53.6 (13.8)                |
| Triglycerides (mg/dL)                          | 136.8 (74.4)                    | 136.6 (76.4)                   | 138.3 (76.4)                   | 138.3 (73.4)               |
| Fasting glucose (mg/dL)                        | 122.1 (41.1)                    | 122.6 (41.0)                   | 122.9 (41.0)                   | 122.9 (41.9)               |
| Energy intake (kcal/d)                         | 2277 (604)                      | 2288 (607)                     | 2224 (607)                     | 2224 (599)                 |
| Total fat (g/d)                                | 98.8 (30.4)                     | 99.2 (30.0)                    | 96.1 (30.0)                    | 96.1 (30.7)                |
| Saturated fat (g/d)                            | 25.3 (9.2)                      | 25.3 (9.1)                     | 24.8 (9.1)                     | 24.8 (9.3)                 |
| MUFA (g/d)                                     | 48.9 (16.0)                     | 49.4 (15.6)                    | 47.5 (15.6)                    | 47.5 (16.4)                |
| PUFA (g/d)                                     | 15.8 (7.0)                      | 15.7 (7.1)                     | 15.3 (7.1)                     | 15.3 (6.8)                 |
| Proteins (g/d)                                 | 92.6 (23.1)                     | 93.4 (22.9)                    | 90.3 (22.9)                    | 90.3 (22.3)                |
| Carbohydrates (g/d)                            | 239.6 (80.9)                    | 240.4 (81.9)                   | 236.3 (81.9)                   | 236.3 (79.8)               |
| Adherence to the MedDiet (points) <sup>c</sup> | 8.7 (2.0)                       | 8.8 (1.9)                      | 8.4 (1.9)                      | 8.4 (2.0)                  |
| Alcohol consumption (g/d)                      | 8.5 (14.3)                      | 8.6 (15.1)                     | 7.5 (15.1)                     | 7.5 (13.1)                 |
| Physical activity (METs-min/day)               | 231 (240)                       | 232 (247)                      | 214 (247)                      | 214 (240)                  |

<sup>a</sup>: Values are mean(SD) for continuous variables and number (%) for categorical variables. BMI indicates body mass index, MUFA, Monounsaturated fatty acids; MedDiet, Mediterranean diet; EVOO, extra virgin olive oil, SPB: Systolic blood pressure, DBP: Diastolic blood pressure.

MUFA, Monounsaturated fatty acids; MedDiet, Mediterranean diet; EVOO, extra virgin olive oil.

<sup>b</sup>: Total indicates the maximum number of participants included with genotype data and demographic, anthropometric, adherence to MedDiet, physical activity and clinical variables. For dietary intake obtained by food-frequency questionnaires n = 7040 subjects were analyzed after exclusion of n = 58 subjects with invalid data. Biochemical data were available for fasting glucose (n = 6716 participants) total cholesterol (n = 6834 participants), HDL cholesterol (n = 6753 participants), LDL cholesterol (n = 6698 participants), and triglycerides (n = 6795 participants).

<sup>c</sup>: Based on a 14-point screener of adherence.

**Table S2: Demographic, clinical and lifestyle characteristics of the PREDIMED study participants at baseline according to the T2D status<sup>a</sup>**

|                                                | Non-T2D subjects<br>(n=3,671) | T2D subjects<br>(n=3,427) | P <sup>1</sup> |
|------------------------------------------------|-------------------------------|---------------------------|----------------|
| Age (years)                                    | 66.6 (6.1)                    | 67.4 (6.3)                | <0.001         |
| Weight (Kg)                                    | 76.7 (11.7)                   | 76.9 (12.2)               | 0.419          |
| BMI (Kg/m <sup>2</sup> )                       | 30.0 (3.6)                    | 29.9 (4.1)                | 0.080          |
| Waist circumference (cm)                       | 99.6 (10.6)                   | 101.2 (10.5)              | <0.001         |
| Female sex : n, %                              | 2262 (61.6)                   | 1808 (52.8)               | <0.001         |
| Current smokers: n, %                          | 592 (16.1)                    | 410 (12.0)                | <0.001         |
| CLOCK-rs4580704: n, %                          |                               |                           | 0.291          |
| CC                                             | 1353 (36.9)                   | 1314 (38.3)               |                |
| CG                                             | 1799 (49.0)                   | 1616 (47.2)               |                |
| GG                                             | 519 (14.1)                    | 497 (14.5)                |                |
| SBP (mm Hg)                                    | 149.1 (20.7)                  | 149.7 (20.9)              | 0.191          |
| DBP (mm Hg)                                    | 84.5 (11.1)                   | 82.2 (10.9)               | <0.001         |
| Heart rate (bpm)                               | 70.0 (10.9)                   | 72.8 (11.3)               | <0.001         |
| Total cholesterol (mg/dL)                      | 219.6 (37.9)                  | 200.8 (36.1)              | <0.001         |
| LDL-C (mg/dL)                                  | 137.1 (34.3)                  | 121.6 (31.2)              | <0.001         |
| HDL-C (mg/dL)                                  | 55.8 (14.2)                   | 51.7 (13.2)               | <0.001         |
| Triglycerides (mg/dL)                          | 132.5 (69.6)                  | 141.5 (79.0)              | <0.001         |
| Fasting glucose (mg/dL)                        | 98.6 (16.7)                   | 147.1 (44.5)              | <0.001         |
| Energy intake (kcal/d)                         | 2322 (600)                    | 2229 (605)                | <0.001         |
| Total fat (g/d)                                | 99.0 (29.5)                   | 98.6 (31.2)               | 0.552          |
| Saturated fat (g/d)                            | 25.2 (9.0)                    | 25.5 (9.4)                | 0.154          |
| MUFA (g/d)                                     | 49.3 (15.5)                   | 48.6 (16.5)               | 0.076          |
| PUFA (g/d)                                     | 15.8 (6.7)                    | 15.9 (7.2)                | 0.824          |
| Proteins (g/d)                                 | 92.0 (22.1)                   | 93.2 (24.1)               | 0.030          |
| Carbohydrates (g/d)                            | 249.7 (82.0)                  | 228.7 (78.3)              | <0.001         |
| Adherence to the MedDiet (points) <sup>c</sup> | 8.7 (2.0)                     | 8.6 (2.0)                 | <0.001         |
| Alcohol consumption (g/d)                      | 9.2 (14.9)                    | 7.7 (13.6)                | 0.006          |
| Physical activity (METs-min/day)               | 224 (225)                     | 239 (255)                 | 0.008          |

<sup>a</sup>: Values are mean(SD) for continuous variables and number (%) for categorical variables. BMI indicates body mass index, MUFA, Monounsaturated fatty acids; MedDiet, Mediterranean diet; EVOO, extra virgin olive oil, SPB: Systolic blood pressure, DBP: Diastolic blood pressure.

<sup>1</sup>: P unadjusted P-value for means comparison.

MUFA, Monounsaturated fatty acids; MedDiet, Mediterranean diet; EVOO, extra virgin olive oil.

<sup>c</sup>: Based on a 14-point screener of adherence.

**Figure S2: Cumulative T2D-free survival by CLOCK-rs4580704 genotypes in non-T2D subjects at baseline depending on the dietary intervention group.** A: Mediterranean diet groups (n=2,477); and B: control group (n=1,194). Cox regression models with outcome of T2D incidence by the CLOCK-rs4580704 SNP (CC versus carriers of the G-allele) were multivariable adjusted for each stratum and the corresponding hazard ratios (HR) and 95%CI were obtained in the multivariable adjusted models. CC subjects were considered the reference category and HR for G-carriers versus CC were estimated. HR1: model adjusted for sex, age and field center. HR2: Models additionally adjusted for BMI, drinking, smoking, physical activity, medications and total energy intake at baseline.

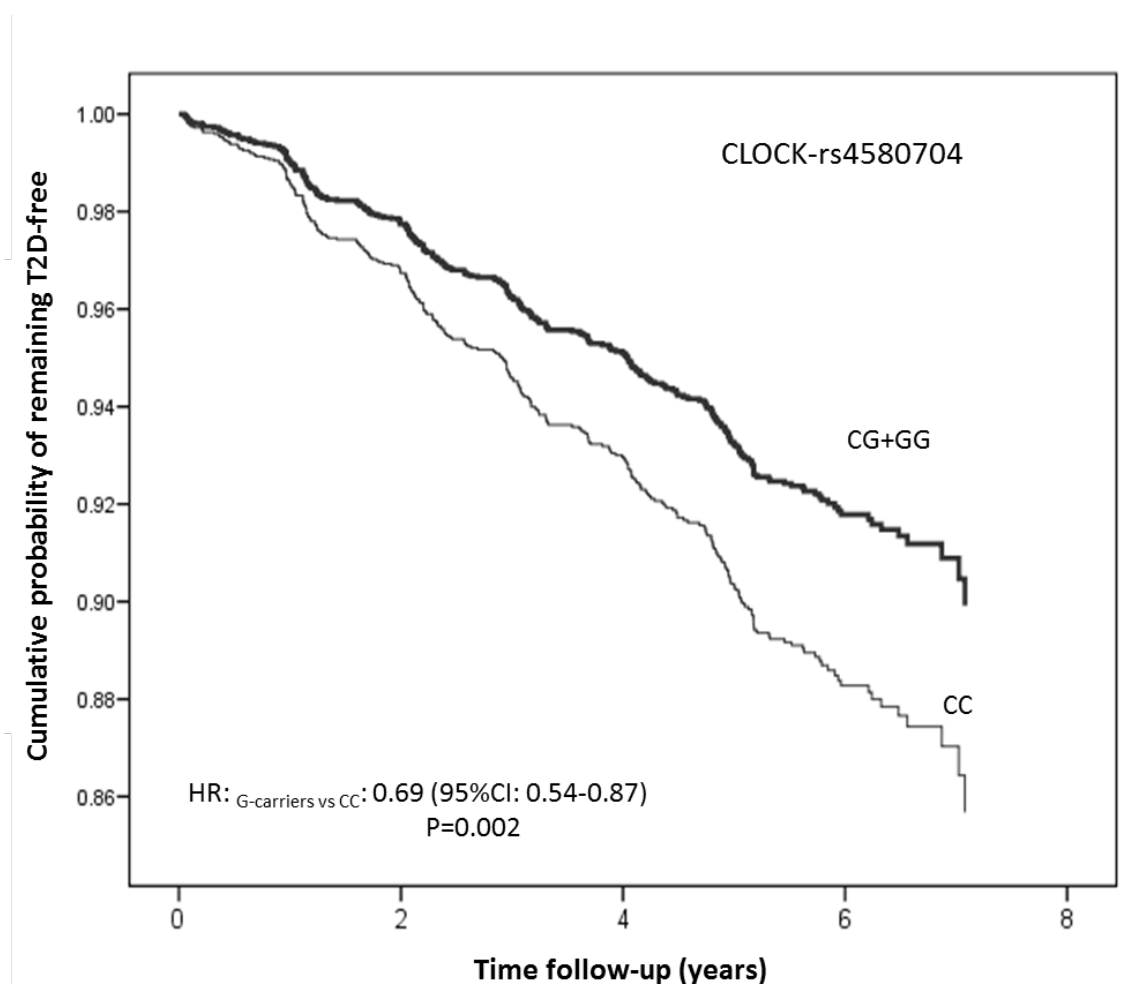

**Table S3. Incidence rate and hazard ratios (HR) for total cardiovascular diseases (CVD) depending on the *CLOCK*-rs4580704. Total and stratified by T2D status at baseline**

| <b>Whole population (n = 7,098)</b>       |           |          |                 |                  |        |         |                  |        |         |
|-------------------------------------------|-----------|----------|-----------------|------------------|--------|---------|------------------|--------|---------|
| CLOCK genotypes                           | CVD cases | person-y | Incidence rate* | Model 1          |        |         | Model 2          |        |         |
|                                           |           |          |                 | HR               | 95% CI | P value | HR               | 95% CI | P value |
| <i>General genetic model</i>              |           |          |                 |                  |        | 0.235   | 0.366            |        |         |
| CC                                        | 105       | 11414.8  | 9.2             | 1.00 (reference) |        |         | 1.00 (reference) |        |         |
| CG                                        | 131       | 14845.0  | 8.8             | 0.95 (0.74-1.24) |        |         | 0.96 (0.75-1.25) |        |         |
| GG                                        | 29        | 4399.3   | 6.6             | 0.70 (0.47-1.06) |        |         | 0.75 (0.49-1.13) |        |         |
| <i>P (interaction CLOCK x T2D status)</i> |           |          |                 |                  |        | 0.017   | 0.019            |        |         |

  

| <b>T2D subjects (n = 3,427)</b> |           |          |                 |                  |        |         |                  |        |         |
|---------------------------------|-----------|----------|-----------------|------------------|--------|---------|------------------|--------|---------|
| CLOCK genotypes                 | CVD cases | person-y | Incidence rate* | Model 1          |        |         | Model 2          |        |         |
|                                 |           |          |                 | HR               | 95% CI | P value | HR               | 95% CI | P value |
| <i>General genetic model</i>    |           |          |                 |                  |        | 0.030   | 0.049            |        |         |
| CC                              | 73        | 5780.3   | 12.6            | 1.00 (reference) |        |         | 1.00 (reference) |        |         |
| CG                              | 84        | 7126.6   | 11.8            | 0.92 (0.67-1.26) |        |         | 0.92 (0.67-1.13) |        |         |
| GG                              | 13        | 2180.3   | 6.0             | 0.45 (0.25-0.82) |        |         | 0.48 (0.27-0.88) |        |         |

  

| <b>Non-T2D subjects (n = 3,671)</b> |           |          |                 |                  |        |         |                  |        |         |
|-------------------------------------|-----------|----------|-----------------|------------------|--------|---------|------------------|--------|---------|
| CLOCK genotypes                     | CVD cases | person-y | Incidence rate* | Model 1          |        |         | Model 2          |        |         |
|                                     |           |          |                 | HR               | 95% CI | P value | HR               | 95% CI | P value |
| <i>General genetic model</i>        |           |          |                 |                  |        | 0.738   | 0.649            |        |         |
| CC                                  | 32        | 5642.0   | 5.7             | 1.00 (reference) |        |         | 1.00 (reference) |        |         |
| CG                                  | 47        | 7717.7   | 6.1             | 1.03 (0.65-1.61) |        |         | 1.04 (0.66-1.64) |        |         |
| GG                                  | 16        | 2219.2   | 7.2             | 1.26 (0.69-2.29) |        |         | 1.31 (0.72-2.42) |        |         |

\*: Crude incidence rates were expressed per 1000 person-years of follow-up

Model 1: Adjusted for sex, age, center and dietary intervention group.

Model 2: Adjusted for variables in model 1 plus BMI, diabetes, drinking, smoking, physical activity, medication (hypertension, dyslipemia and glucose), adherence to the Mediterranean Diet and total energy intake at baseline.

P for interaction terms between the *CLOCK* SNP (as general genetic model) with T2D were estimated in the corresponding multivariable model.

**Figure S3: Cumulative stroke-free survival by CLOCK-rs4580704 genotypes in T2D subjects at baseline (n=3,427).** Cox regression models with outcome of stroke incidence by the CLOCK-rs4580704 SNP were multivariable adjusted. Hazard ratios (HR) and 95%CI were obtained in the multivariable adjusted models. CC subjects were considered the reference category and HR for G-carriers versus CC were estimated in the model adjusted for sex, age, field center, dietary intervention group, BMI, drinking, smoking, physical activity, medications and total energy intake at baseline.

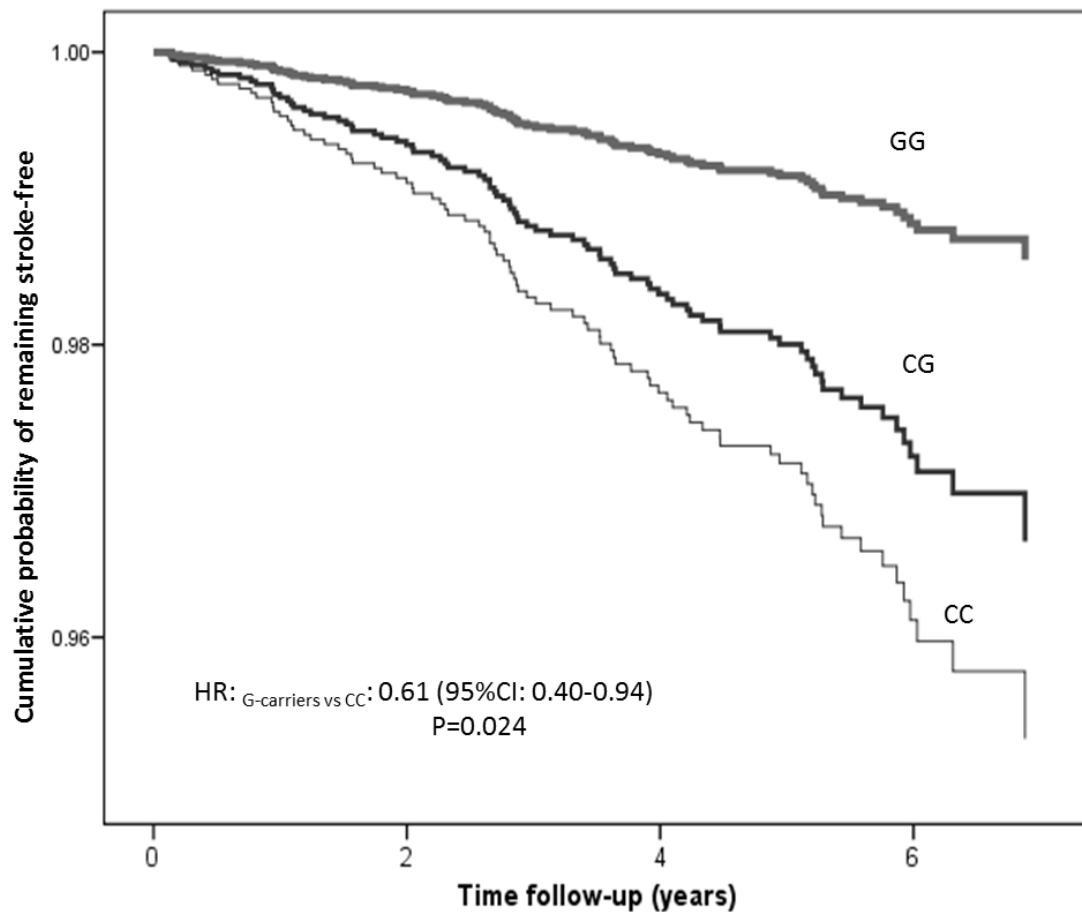

**Table S4. Incidence rate and hazard ratios (HR) for stroke depending on the *CLOCK*-rs4580704 in T2D subjects and stratified by dietary intervention**

| CLOCK genotypes                                     | MedDiet (n = 2,304) |          |                 |         |             |         |         |             |         |
|-----------------------------------------------------|---------------------|----------|-----------------|---------|-------------|---------|---------|-------------|---------|
|                                                     | cases               | person-y | Incidence rate* | Model 1 |             |         | Model 2 |             |         |
|                                                     |                     |          |                 | HR      | 95% CI      | P value | HR      | 95% CI      | P value |
| <i>Dominant model</i>                               |                     |          |                 |         |             | 0.030   |         |             | 0.032   |
| CC                                                  | 27                  | 4140.4   | 6.5             | 1.00    | (reference) |         | 1.00    | (reference) |         |
| CG + GG                                             | 22                  | 6453.0   | 3.4             | 0.54    | (0.31-0.94) | 0.030   | 0.54    | (0.31-0.95) | 0.032   |
| <i>P (interaction CLOCK x MedDiet intervention)</i> |                     |          |                 |         |             | 0.470   |         |             | 0.439   |
| Control group (n = 1,123)                           |                     |          |                 |         |             |         |         |             |         |
| CLOCK genotypes                                     | cases               | person-y | Incidence rate* | Model 1 |             |         | Model 2 |             |         |
|                                                     |                     |          |                 | HR      | 95% CI      | P value | HR      | 95% CI      | P value |
| <i>Dominant model</i>                               |                     |          |                 |         |             | 0.306   |         |             | 0.335   |
| CC                                                  | 16                  | 1639.8   | 9.8             | 1.00    | (reference) |         | 1.00    | (reference) |         |
| CG + GG                                             | 21                  | 2856.1   | 7.4             | 0.71    | (0.37-1.37) | 0.306   | 0.72    | (0.37-1.40) | 0.335   |

\*: Crude incidence rates were expressed per 1000 person-years of follow-up

MedDiet, Mediterranean diet; EVOO, extra virgin olive oil.

Model 1: Adjusted for sex, age, center and dietary intervention group.

Model 2: Adjusted for variables in model 1 plus BMI, drinking, smoking, physical activity, medication (hypertension, dyslipemia and glucose), adherence to the Mediterranean Diet and total energy intake at baseline.

P for interaction terms between the *CLOCK* SNP (as dominant) with dietary intervention (MedDiet vs Control group) were determined in the corresponding multivariable models.
